# Supplementary material for: First Trimester Microelements and Their Relationships with Pregnancy Outcomes and Complications
Source: PubMed Central journal article supplement (PMC7230599; doi:10.3390/nu12041108), 2020-04-16
Supplement: nutrients-12-01108-s001.pdf [file nutrients-12-01108-s001.pdf]

**Table 1.** Full characteristics of microelement levels (medians and ranges) for various maternal characteristics.

|                                        | <b>n</b> | <b>Mean</b> | <b>SD</b> | <b>Q25</b> | <b>Media<br/>n</b> | <b>Q75</b> | <b>p **</b>   |
|----------------------------------------|----------|-------------|-----------|------------|--------------------|------------|---------------|
| <b>SELENIUM (Se) *</b>                 |          |             |           |            |                    |            |               |
| Multiparous                            | 334      | 60.67       | 7.00      | 55.70      | 60.33              | 65.11      | 0.328         |
| Primiparous                            | 229      | 60.87       | 10.15     | 54.24      | 59.95              | 64.47      |               |
| Age <35 years                          | 205      | 59.34       | 9.08      | 53.65      | 58.42              | 63.65      | <b>0.0002</b> |
| Age ≥35 years                          | 358      | 61.56       | 7.91      | 56.25      | 61.07              | 65.82      |               |
| Prepregnancy BMI <25kg/m <sup>2</sup>  | 343      | 61.33       | 8.04      | 55.82      | 60.91              | 65.40      | <b>0.006</b>  |
| Prepregnancy BMI ≥25 kg/m <sup>2</sup> | 220      | 59.84       | 8.92      | 54.18      | 58.71              | 64.34      |               |
| Smoking at recruitment—No              | 527      | 61.02       | 8.43      | 55.38      | 60.41              | 65.16      | <b>0.009</b>  |
| Smoking at recruitment —Yes            | 36       | 56.79       | 7.21      | 53.44      | 57.46              | 63.06      |               |
| Higher education—No                    | 175      | 59.62       | 9.32      | 53.57      | 58.20              | 64.92      | <b>0.0005</b> |
| Higher education—Yes                   | 293      | 61.59       | 7.22      | 56.78      | 60.99              | 65.73      |               |
| Village—No                             | 402      | 61.02       | 8.87      | 55.70      | 60.25              | 65.11      | 0.324         |
| Village—Yes                            | 160      | 60.08       | 7.17      | 54.24      | 60.23              | 63.86      |               |
| Lower financial status ***             | 83       | 59.30       | 8.91      | 53.73      | 58.89              | 64.43      | <b>0.006</b>  |
| Higher financial status                | 131      | 61.91       | 6.97      | 57.12      | 60.82              | 66.64      |               |
| <b>IRON (Fe) *</b>                     |          |             |           |            |                    |            |               |
| Multiparous                            | 334      | 1011.78     | 344.66    | 798.12     | 1000.24            | 1183.11    | 0.730         |
| Primiparous                            | 229      | 1027.89     | 338.26    | 806.99     | 982.33             | 1235.26    |               |
| Age <35 years                          | 205      | 1044.98     | 376.72    | 803.74     | 994.68             | 1261.10    | 0.468         |
| Age ≥35 years                          | 358      | 1003.07     | 319.75    | 800.90     | 992.97             | 1176.04    |               |
| Prepregnancy BMI <25kg/m <sup>2</sup>  | 343      | 1051.29     | 342.50    | 833.98     | 1031.56            | 1248.14    | <b>0.002</b>  |
| Prepregnancy BMI ≥25 kg/m <sup>2</sup> | 220      | 966.95      | 335.21    | 738.63     | 921.78             | 1134.76    |               |
| Smoking at recruitment—No              | 527      | 1015.94     | 340.14    | 796.21     | 994.36             | 1207.57    | 0.612         |
| Smoking at recruitment—Yes             | 36       | 1053.31     | 369.45    | 849.25     | 948.26             | 1224.86    |               |
| Higher education—No                    | 175      | 1030.44     | 361.58    | 786.98     | 1031.02            | 1237.01    | 0.721         |
| Higher education—Yes                   | 293      | 1023.05     | 334.68    | 827.71     | 972.50             | 1199.15    |               |
| Village—No                             | 402      | 1015.55     | 340.66    | 804.74     | 994.15             | 1207.57    | 0.910         |
| Village—Yes                            | 160      | 1027.58     | 345.65    | 788.74     | 994.48             | 1214.02    |               |
| Lower financial status ***             | 83       | 933.87      | 319.38    | 750.21     | 921.90             | 1137.20    | <b>0.001</b>  |
| Higher financial status                | 131      | 1106.05     | 337.95    | 856.61     | 1063.21            | 1281.05    |               |
| <b>ZINC (Zn) *</b>                     |          |             |           |            |                    |            |               |
| Multiparous                            | 334      | 603.69      | 84.32     | 546.78     | 598.03             | 653.418    | <b>0.007</b>  |
| Primiparous                            | 229      | 640.08      | 209.67    | 556.04     | 623.00             | 676.42     |               |
| Age <35 years                          | 205      | 626.08      | 212.83    | 538.12     | 607.62             | 667.01     | 0.862         |
| Age ≥35 years                          | 358      | 614.15      | 96.32     | 553.29     | 606.14             | 660.20     |               |
| Prepregnancy BMI <25kg/m <sup>2</sup>  | 343      | 611.65      | 92.16     | 550.37     | 606.61             | 660.20     | 0.893         |
| Prepregnancy BMI ≥25 kg/m <sup>2</sup> | 220      | 629.17      | 209.65    | 547.97     | 606.60             | 663.57     |               |
| Smoking at recruitment—No              | 527      | 618.24      | 152.86    | 548.04     | 605.54             | 663.89     | 0.353         |
| Smoking at recruitment —Yes            | 36       | 622.20      | 89.34     | 570.19     | 627.79             | 657.91     |               |
| Higher education—No                    | 175      | 640.13      | 227.81    | 556.04     | 610.48             | 674.72     | 0.197         |
| Higher education—Yes                   | 293      | 606.79      | 87.16     | 543.31     | 604.93             | 656.25     |               |
| Village—No                             | 402      | 614.35      | 102.14    | 550.36     | 607.64             | 661.26     | 0.767         |
| Village—Yes                            | 160      | 629.20      | 229.31    | 547.60     | 603.34             | 669.09     |               |
| Lower financial status                 | 83       | 641.96      | 311.84    | 547.92     | 606.73             | 651.05     | 0.610         |
| Higher financial status                | 131      | 614.10      | 92.51     | 548.39     | 607.83             | 654.15     |               |
| <b>COPPER (Cu) *</b>                   |          |             |           |            |                    |            |               |
| Multiparous                            | 334      | 1750.18     | 293.38    | 1555.11    | 1737.13            | 1938.79    | 0.065         |
| Primiparous                            | 229      | 1715.10     | 356.98    | 1481.43    | 1687.54            | 1904.89    |               |
| Age <35 years                          | 205      | 1733.78     | 335.20    | 1525.95    | 1732.37            | 1905.78    | 0.652         |
| Age ≥35 years                          | 358      | 1737.13     | 312.94    | 1543.09    | 1722.71            | 1930.14    |               |

|                                        |     |         |        |         |              |         |                 |
|----------------------------------------|-----|---------|--------|---------|--------------|---------|-----------------|
| Prepregnancy BMI <25kg/m <sup>2</sup>  | 343 | 1665.16 | 273.38 | 1480.52 | 1665.40      | 1832.70 | <b>1.96E-10</b> |
| Prepregnancy BMI ≥25 kg/m <sup>2</sup> | 220 | 1846.21 | 357.11 | 1638.64 | 1807.34      | 2021.81 |                 |
| Smoking at recruitment—No              | 527 | 1737.08 | 324.18 | 1534.20 | 1729.44      | 1923.11 | 0.645           |
| Smoking at recruitment —Yes            | 36  | 1718.79 | 272.24 | 1530.15 | 1647.12      | 1921.34 |                 |
| Higher education—No                    | 175 | 1798.29 | 340.71 | 1595.28 | 1779.06      | 1985.73 | <b>0.001</b>    |
| Higher education—Yes                   | 293 | 1699.65 | 284.66 | 1522.93 | 1690.54      | 1863.26 |                 |
| Village—No                             | 402 | 1731.30 | 331.03 | 1529.33 | 1724.51      | 1930.14 | 0.516           |
| Village—Yes                            | 160 | 1748.43 | 295.50 | 1543.81 | 1733.09      | 1901.93 |                 |
| Lower financial status ***             | 83  | 1799.13 | 376.59 | 1556.88 | 1772.64<br>0 | 1974.01 | 0.394           |
| Higher financial status                | 131 | 1736.00 | 300.54 | 1543.92 | 1732.40      | 1910.50 |                 |

\*Microelement concentrations were measured in serum from the 10–14th gestational week; \*\* *p*-value was obtained using the Mann–Whitney U test and medians were compared ( $p < 0.05$  was considered to be significant); \*\*\*financial status in the 5-point Likert scale (lower status included 1–2–3th levels and higher status included 4–5th levels); BMI: Prepregnancy body mass index.

**Table 2.** Full characteristics of microelement levels (medians and ranges) for pregnancy results.

|                               | <b>n</b> | <b>Mean</b> | <b>SD</b> | <b>Q25</b> | <b>Median</b> | <b>Q75</b> | <b>p**</b>      |
|-------------------------------|----------|-------------|-----------|------------|---------------|------------|-----------------|
| <b>SELENIUM (Se) *</b>        |          |             |           |            |               |            |                 |
| Normotensive controls         | 443      | 61.62       | 8.66      | 55.78      | 61.26         | 65.82      | <b>2.14E-06</b> |
| PIH cases                     | 120      | 57.56       | 6.54      | 53.21      | 57.47         | 61.62      |                 |
| Women without GDM             | 453      | 60.48       | 8.05      | 55.04      | 60.02         | 64.62      | 0.161           |
| GDM cases                     | 110      | 61.88       | 9.74      | 55.79      | 61.48         | 65.91      |                 |
| IUGR—No                       | 550      | 60.87       | 8.40      | 55.38      | 60.28         | 65.11      | <b>0.026</b>    |
| IUGR—Yes                      | 13       | 55.59       | 7.90      | 50.80      | 54.62         | 60.86      |                 |
| Birth weight ≥10th percentile | 515      | 60.86       | 8.40      | 55.49      | 60.28         | 65.02      | 0.303           |
| Birth weight <10th percentile | 48       | 59.60       | 8.60      | 52.15      | 59.37         | 65.23      |                 |
| Birth weight ≤90th percentile | 499      | 60.89       | 8.64      | 55.08      | 60.28         | 65.18      | 0.296           |
| Birth weight >90th percentile | 64       | 59.66       | 6.34      | 55.26      | 59.34         | 62.86      |                 |
| Birth ≥34th week              | 546      | 60.88       | 8.39      | 55.38      | 60.28         | 65.05      | <b>0.043</b>    |
| Preterm birth <34th week      | 17       | 56.71       | 8.59      | 51.50      | 55.30         | 61.39      |                 |
| Birth ≥37th week              | 516      | 60.91       | 8.43      | 55.44      | 60.30         | 65.03      | 0.148           |
| Preterm birth <37th week      | 47       | 58.97       | 8.20      | 53.34      | 57.97         | 65.91      |                 |
| <b>IRON (Fe) *</b>            |          |             |           |            |               |            |                 |
| Normotensive controls         | 443      | 1037.15     | 341.97    | 828.96     | 1006.77       | 1216.58    | <b>0.014</b>    |
| PIH cases                     | 120      | 948.86      | 333.73    | 713.34     | 908.27        | 1168.33    |                 |
| Women without GDM             | 453      | 1031.52     | 347.36    | 823.20     | 1010.09       | 1223.09    | <b>0.039</b>    |
| GDM cases                     | 110      | 964.03      | 313.88    | 751.39     | 938.32        | 1127.22    |                 |
| IUGR—No                       | 550      | 1020.89     | 343.14    | 801.46     | 994.86        | 1211.47    | 0.316           |
| IUGR—Yes                      | 13       | 910.08      | 271.15    | 795.34     | 938.73        | 1051.70    |                 |
| Birth weight ≥10th percentile | 515      | 1022.90     | 345.31    | 801.46     | 995.04        | 1221.88    | 0.374           |
| Birth weight <10th percentile | 48       | 969.28      | 301.28    | 791.16     | 932.88        | 1117.62    |                 |
| Birth weight ≤90th percentile | 499      | 1024.00     | 347.23    | 803.74     | 995.04        | 1211.47    | 0.361           |
| Birth weight >90th percentile | 64       | 974.11      | 295.33    | 775.72     | 922.99        | 1153.14    |                 |
| Birth ≥34th week              | 546      | 1021.87     | 343.43    | 803.74     | 994.15        | 1211.47    | 0.186           |
| Preterm birth <34th week      | 17       | 904.82      | 270.51    | 699.18     | 824.42        | 1104.54    |                 |
| Birth ≥37th week              | 516      | 1026.80     | 349.09    | 801.74     | 994.52        | 1230.29    | 0.091           |
| Preterm birth <37th week      | 47       | 925.40      | 232.10    | 780.91     | 924.08        | 1089.67    |                 |
| <b>ZINC (Zn) *</b>            |          |             |           |            |               |            |                 |
| Normotensive controls         | 443      | 620.75      | 162.28    | 548.04     | 606.42        | 664.99     | 0.976           |
| PIH cases                     | 120      | 610.16      | 87.95     | 552.91     | 607.64        | 659.35     |                 |
| Women without GDM             | 453      | 615.90      | 158.54    | 543.31     | 605.50        | 659.03     | 0.084           |
| GDM cases                     | 110      | 629.20      | 104.66    | 568.73     | 620.77        | 680.91     |                 |
| IUGR—No                       | 550      | 618.06      | 151.00    | 548.04     | 606.45        | 661.26     | 0.159           |
| IUGR—Yes                      | 13       | 636.82      | 64.06     | 599.83     | 635.49        | 678.88     |                 |
| Birth weight ≥10th percentile | 515      | 617.32      | 153.54    | 547.90     | 605.54        | 661.03     | 0.143           |
| Birth weight <10th percentile | 48       | 631.09      | 97.19     | 574.25     | 628.34        | 679.32     |                 |
| Birth weight ≤90th percentile | 499      | 618.81      | 155.99    | 547.92     | 606.61        | 662.89     | 0.903           |
| Birth weight >90th percentile | 64       | 616.04      | 84.85     | 556.57     | 607.07        | 660.04     |                 |
| Birth ≥34th week              | 546      | 619.09      | 151.14    | 548.54     | 607.07        | 663.89     | 0.388           |
| Preterm birth <34th week      | 17       | 599.35      | 85.06     | 553.04     | 577.96        | 634.03     |                 |
| Birth ≥37th week              | 516      | 619.75      | 154.52    | 547.98     | 607.07        | 664.81     | 0.561           |
| Preterm birth <37th week      | 47       | 604.76      | 75.82     | 555.54     | 603.08        | 642.93     |                 |
| <b>COPPER (Cu) *</b>          |          |             |           |            |               |            |                 |
| Normotensive controls         | 443      | 1745.78     | 326.15    | 1534.200   | 1733.92       | 1931.60    | 0.235           |
| PIH cases                     | 120      | 1699.48     | 299.35    | 1528.42    | 1671.98       | 1910.50    |                 |
| Women without GDM             | 453      | 1720.77     | 310.21    | 1529.56    | 1717.80       | 1912.35    | 0.061           |
| GDM cases                     | 110      | 1798.27     | 356.53    | 1563.33    | 1786.64       | 1964.95    |                 |
| IUGR—No                       | 550      | 1739.66     | 319.93    | 1535.51    | 1729.41       | 1930.14    | 0.113           |
| IUGR—Yes                      | 13       | 1577.29     | 336.24    | 1291.08    | 1655.65       | 1750.91    |                 |
| Birth weight ≥10th percentile | 515      | 1743.77     | 324.46    | 1535.51    | 1733.92       | 1932.43    | <b>0.031</b>    |
| Birth weight <10th percentile | 48       | 1651.58     | 268.92    | 1496.25    | 1627.53       | 1778.93    |                 |
| Birth weight ≤90th percentile | 499      | 1736.43     | 323.61    | 1529.99    | 1729.39       | 1923.11    | 0.853           |

|                               |     |         |        |         |         |         |       |
|-------------------------------|-----|---------|--------|---------|---------|---------|-------|
| Birth weight >90th percentile | 64  | 1731.86 | 301.55 | 1584.95 | 1710.01 | 1929.49 |       |
| Birth ≥34th week              | 546 | 1732.91 | 318.39 | 1532.84 | 1722.35 | 1918.57 | 0.188 |
| Preterm birth <34th week      | 17  | 1832.31 | 393.00 | 1546.52 | 1877.77 | 2130.67 |       |
| Birth ≥37th week              | 516 | 1734.47 | 319.89 | 1532.83 | 1721.72 | 1926.20 | 0.556 |
| Preterm birth <37th week      | 47  | 1751.74 | 335.29 | 1541.95 | 1748.77 | 1912.79 |       |

\* Microelement concentrations were measured in serum from the 10–14th gestational week; \*\* *p*-value was obtained using the nonparametric Mann–Whitney U test and medians were compared ( $p < 0.05$  was considered to be significant; PIH: Pregnancy-induced hypertension (105 cases of gestational hypertension and 15 cases of preeclampsia); GDM: Gestational diabetes mellitus (90 cases with dietary modification (GDM-1) and 20 cases with additional insulin therapy (GDM-2)); IUGR: Intrauterine growth restriction.

**Table 3.** Adjusted relationships between pregnancy results and microelements in the multivariable linear regression.

|                                        | Multivariable linear regression |               |               |                    |
|----------------------------------------|---------------------------------|---------------|---------------|--------------------|
|                                        | Beta **                         | $\beta$ ***   | p ***         | R <sup>2</sup> *** |
| <b>SELENIUM (Se)</b>                   |                                 |               |               |                    |
| Pregnancy-induced hypertension (PIH)   | <b>-1.824</b>                   | <b>-0.178</b> | <b>0.0002</b> | 0.085              |
| Isolated gestational hypertension (GH) | <b>-1.885</b>                   | <b>-0.175</b> | <b>0.0002</b> | 0.084              |
| Preeclampsia (PE)                      | -0.345                          | -0.013        | 0.752         | 0.061              |
| Intrauterine growth restriction (IUGR) | <b>-5.310</b>                   | <b>-0.095</b> | <b>0.022</b>  | 0.069              |
| Gestational diabetes mellitus (GDM)    | 0.773                           | 0.073         | 0.082         | 0.066              |
| GDM-1                                  | 0.927                           | 0.081         | 0.053         | 0.067              |
| GDM-2                                  | -0.118                          | -0.005        | 0.902         | 0.061              |
| Gestational age at birth #             | <b>0.020</b>                    | <b>0.083</b>  | <b>0.044</b>  | 0.113              |
| <b>IRON (Fe)</b>                       |                                 |               |               |                    |
| Pregnancy-induced hypertension (PIH)   | -36.466                         | -0.087        | 0.068         | 0.040              |
| Isolated gestational hypertension (GH) | -17.918                         | -0.041        | 0.387         | 0.036              |
| Preeclampsia                           | <b>-100.153</b>                 | <b>-0.094</b> | <b>0.026</b>  | 0.043              |
| Intrauterine growth restriction (IUGR) | -112.247                        | -0.049        | 0.240         | 0.037              |
| Gestational diabetes mellitus (GDM)    | -21.883                         | -0.051        | 0.233         | 0.037              |
| GDM-1                                  | -23.770                         | -0.051        | 0.229         | 0.037              |
| GDM-2                                  | -6.461                          | -0.007        | 0.869         | 0.035              |
| Gestational age at birth #             | 0.0004                          | 0.074         | 0.083         | 0.033              |
| <b>ZINC (Zn)</b>                       |                                 |               |               |                    |
| Pregnancy-induced hypertension (PIH)   | -14.483                         | -0.079        | 0.099         | 0.028              |
| Isolated gestational hypertension (GH) | -11.505                         | -0.060        | 0.207         | 0.026              |
| Preeclampsia (PE)                      | -19.064                         | -0.041        | 0.336         | 0.024              |
| Intrauterine growth restriction (IUGR) | 18.141                          | 0.018         | 0.666         | 0.023              |
| Gestational diabetes mellitus (GDM)    | 5.115                           | 0.027         | 0.526         | 0.024              |
| GDM-1                                  | 5.049                           | 0.025         | 0.562         | 0.023              |
| GDM-2                                  | 3.512                           | 0.009         | 0.839         | 0.023              |
| Gestational age at birth #             | -0.0003                         | -0.021        | 0.612         | 0.029              |
| <b>COPPER (Cu)</b>                     |                                 |               |               |                    |
| Pregnancy-induced hypertension (PIH)   | <b>-38.487</b>                  | <b>-0.098</b> | <b>0.030</b>  | 0.142              |
| Isolated gestational hypertension (GH) | -34.348                         | -0.083        | 0.062         | 0.140              |
| Preeclampsia (PE)                      | -32.837                         | -0.033        | 0.412         | 0.136              |
| Intrauterine growth restriction (IUGR) | -148.820                        | -0.070        | 0.080         | 0.139              |
| Gestational diabetes mellitus (GDM)    | 27.910                          | 0.069         | 0.087         | 0.139              |
| GDM-1                                  | 33.454                          | 0.076         | <b>0.057</b>  | 0.140              |
| GDM-2                                  | -4.166                          | -0.005        | 0.905         | 0.135              |
| Gestational age at birth #             | -0.00003                        | 0.005         | 0.911         | 0.028              |

Relationships between IUGR, PIH, and GDM, and the microelements were calculated after adjusting for age, prepregnancy BMI, gestational age at recruitment, smoking, parity, prior PIH, assisted reproductive technology; # the impact of the microelements on gestational age at recruitment was calculated after adjusting for preeclampsia, delivery by caesarean section, maternal age, prepregnancy BMI, gestational age at recruitment, smoking, parity and fetal sex (the results were not sustained in models with PROM: Premature rupture of membranes); \* Beta: Unstandardized regression coefficient; \*\*  $\beta$ : Standardized regression coefficient; \*\*\* p < 0.05 was considered to be significant; \*\*\*\* R<sup>2</sup>: Coefficient of determination; pregnancy-induced hypertension (PIH) included 105 cases of gestational hypertension and 15 cases of preeclampsia; gestational diabetes mellitus (GDM) included 90 cases with dietary modification (GDM-1) and 20 cases with additional insulin therapy (GDM-2).

**Table 4.** Short characteristics of mothers in the control and case groups (for PIH and preterm birth).

| Characteristics **                              | Controls                         | Cases                           | p ***   |
|-------------------------------------------------|----------------------------------|---------------------------------|---------|
|                                                 | Normotensives<br>(n = 443)       | PIH *<br>(n = 120)              |         |
| Maternal age ≥35 years                          | 279 (63.0%)                      | 79 (65.8%)                      | 0.564   |
| Prepregnancy BMI ≥ 30 kg/m <sup>2</sup>         | 49 (11.1%)                       | 34 (28.3%)                      | <0.0001 |
| Smokers (at recruitment)                        | 20 (4.5%)                        | 16 (13.3%)                      | 0.0005  |
| Prior PE                                        | 1 (0.2%)                         | 3 (2.5%)                        | 0.032   |
| Prior PIH (GH and PE)                           | 3 (0.7%)                         | 13 (10.8%)                      | <0.0001 |
| ART                                             | 19 (4.3%)                        | 11 (9.2%)                       | 0.035   |
| Use of Aspirin in pregnancy                     | 7 (1.6%)                         | 4 (3.3%)                        | 0.259   |
| Multivitamins in II-III trimester **            | 215 (48.5%)                      | 49 (40.8%)                      | 0.134   |
| Lower education level (for available data)#     | 127 (34.9%)                      | 48 (46.1%)                      | 0.036   |
| Higher financial status (for available data) ## | 99 (65.6%)                       | 32 (50.8%)                      | 0.043   |
| Systolic blood pressure (mmHg) ** **            | 106.7 (11.3)                     | 158.6 (18.2)                    | <0.001  |
| Diastolic blood pressure (mmHg) ** **           | 66.0 (8.9)                       | 100.3 (10.5)                    | <0.001  |
| Birth weight <10th percentile                   | 26 (5.87%)                       | 22 (18.3%)                      | <0.001  |
| Characteristics **                              | Delivery ≥37th week<br>(n = 516) | Delivery <37th week<br>(n = 47) | p ***   |
| Maternal age ≥35 years                          | 321 (62.2%)                      | 37 (78.7%)                      | 0.024   |
| Prepregnancy BMI ≥ 30 kg/m <sup>2</sup>         | 72 (14.0%)                       | 11 (23.4%)                      | 0.080   |
| Smokers (at recruitment)                        | 33 (6.4%)                        | 3 (6.4%)                        | 1.000   |
| Multivitamins in II-III trimester **            | 241 (46.7%)                      | 23 (48.9%)                      | 0.769   |
| Lower education level (for available data)#     | 158 (36.7%)                      | 17 (44.7%)                      | 0.329   |
| Higher financial status (for available data) ## | 125 (62.5%)                      | 2 (100%)                        | 0.531   |
| Preeclampsia                                    | 9 (1.7%)                         | 6 (12.8%)                       | <0.0007 |
| PROM                                            | 42 (8.1%)                        | 10 (21.3%)                      | 0.007   |
| Caesarean section                               | 207 (40.1%)                      | 31 (66.0%)                      | 0.0006  |
| Urinary tract infection                         | 85 (16.5%)                       | 11 (23.4%)                      | 0.226   |
| Birth weight <10th percentile                   | 41 (8.0%)                        | 7 (14.9%)                       | <0.001  |

\*PIH: Pregnancy-induced hypertension (included 105 cases of gestational hypertension (GH) and 15 cases of preeclampsia (PE)); \*\* parity was insignificantly associated with PIH and preterm birth; \*\*\* the Pearson chi-square test was used for categorical variables comparisons ( $p$ -value < 0.05 was considered to be significant); \*\*\* blood pressure after leaving the postpartum ward; # education other than higher; ## financial status in the 5-point Likert scale (higher status included 4–5th levels); BMI: Body mass index; ART: Assisted reproductive technology; PROM: Premature rupture of membranes.
